# Supplementary material
Source: MDPI journal article supplement (https://www.mdpi.com/2306-5710/8/1/17)

## Supplementary Materials

Figure S1: Color difference for each carrot juice batch during storage time, as referred to day of preparation. C1, C2, C3: three batches at day 3, none afterwards; L1 to L7: seven batches at days 3 and 7, five at day 10 (L2 and L4 discarded) and four at day 14 (L3 discarded).

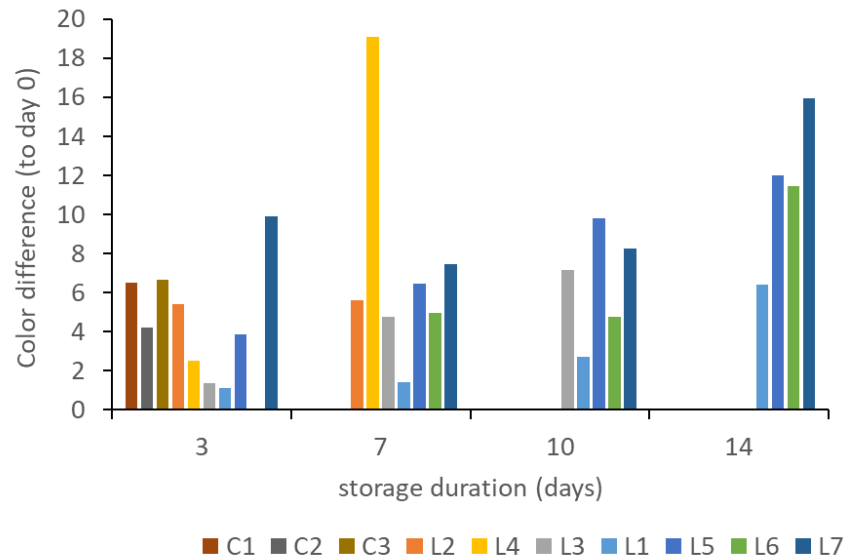

Supplement: s1 [file s1]
